# Supplementary material for: Grapecluster-like Fe3O4@C/CNT nanostructures with stable Li-storage capability
Source: Royal Society of Chemistry journal article supplement (doi:10.1039/c3ta13141f), 2013-01-01
Supplement: c3ta13141f.pdf [file c3ta13141f.pdf]

## Supporting Information

### Grapecluster-like $\text{Fe}_3\text{O}_4/\text{C}@$ CNT nanostructures with stable Li-storage capability

Jianzhong Liu, Jiangfeng Ni,<sup>\*</sup> Yang Zhao, Haibo Wang and Lijun Gao<sup>\*</sup>

School of Energy, Soochow University, Suzhou, Jiangsu 215006, China

<sup>\*</sup> Corresponding author. Tel/fax: +86-512-67875503.

*E-mail addresses:* [jeffni@suda.edu.cn](mailto:jeffni@suda.edu.cn) (J. Ni); [gaolijun@suda.edu.cn](mailto:gaolijun@suda.edu.cn) (L. Gao),

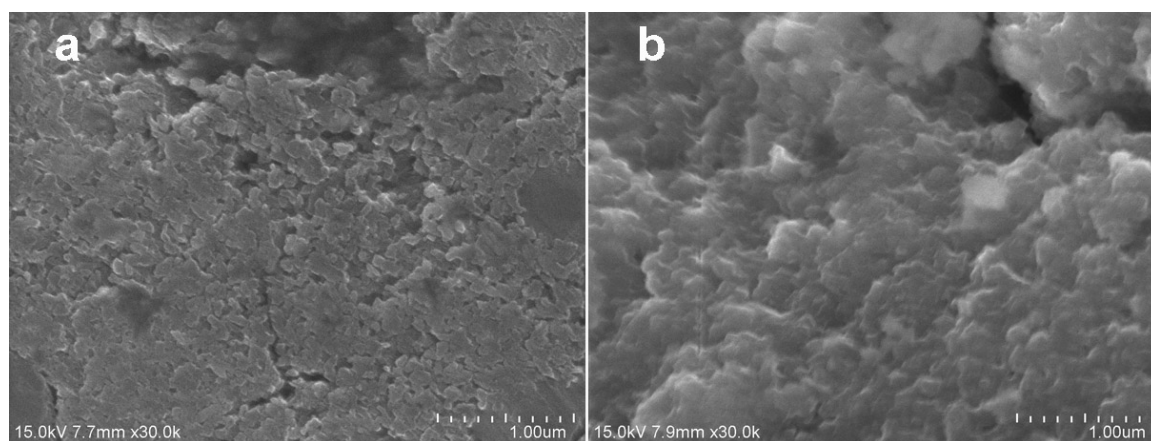

**Figure S1** SEM images of  $\text{Fe}_3\text{O}_4/\text{C}@$ CNT electrode sheets (a) before and (b) after 200-discharge/charge cycles. A cotton-like gel film is clearly seen in the cycled electrode.
